# Supplementary material for: Physical, photophysical and structural properties of ruthenium(ii) complexes containing a tetradentate bipyridine ligand
Source: Royal Society of Chemistry journal article supplement (doi:10.1039/b800531a), 2008-01-01
Supplement: b800531a.pdf [file b800531a.pdf]

**Supplementary Information:**

S1.  $[\text{Ru}(\text{bpy})(\text{Obpy})]^{2+}$

- a. Cartesian Coordinates from calculations
- b. TDDFT Singlet Results
- c. TDDFT Spectra Comparison
- d. TDDFT Triplet Results

S2.  $[(\text{Ru}(\text{bpy})_2)_2\text{Obpy}]^{4+}$

- a. Cartesian Coordinates from calculations
- b. TDDFT Triplet Results

S3.  $[\text{Ru}(\text{bpy})_3]^{2+}$

- a. Cartesian Coordinates from calculations
- b. TDDFT Triplet Results
- c.

S4. Graphical Representation of Orbital Distribution

S5. Inter atom bond distances of O-bpy dimer

S6. TDDFT Triplet State Results

### S1.a. Cartesian Coordinates from calculations

| Atom | Coordinates |           |           |
|------|-------------|-----------|-----------|
|      | X           | Y         | Z         |
| Re   | -0.013778   | 0.063187  | -0.001508 |
| N    | -0.072699   | 0.020134  | 2.105339  |
| C    | 1.153888    | -0.206737 | 2.690007  |
| C    | -1.180205   | 0.127362  | 2.895992  |
| C    | 1.254941    | -0.591278 | 4.038474  |
| C    | -1.135899   | -0.264224 | 4.246138  |
| C    | 0.084109    | -0.684874 | 4.808600  |
| H    | 2.219806    | -0.797839 | 4.486506  |
| H    | -2.035004   | -0.206519 | 4.850614  |
| H    | 0.131132    | -1.010526 | 5.842936  |
| N    | 0.404744    | -2.006188 | 0.068220  |
| C    | 1.622494    | -2.589106 | 0.270643  |
| C    | -0.703243   | -2.825019 | -0.038399 |
| C    | 1.789470    | -3.971723 | 0.415380  |
| H    | 2.477420    | -1.928944 | 0.306244  |
| C    | -0.595715   | -4.219781 | 0.120359  |
| C    | 0.656797    | -4.804544 | 0.359133  |
| H    | 2.782854    | -4.378584 | 0.570744  |
| H    | -1.475955   | -4.847578 | 0.053384  |
| H    | 0.747948    | -5.878741 | 0.483536  |
| N    | -1.877266   | -0.771837 | -0.507964 |
| C    | -1.958615   | -2.144197 | -0.405108 |
| C    | -2.959219   | -0.090204 | -0.987681 |
| C    | -3.149843   | -2.828100 | -0.719537 |
| C    | -4.159989   | -0.719244 | -1.332395 |
| H    | -2.849703   | 0.981809  | -1.082423 |
| C    | -4.266365   | -2.115194 | -1.178620 |

|   |           |           |           |
|---|-----------|-----------|-----------|
| H | -3.204119 | -3.906052 | -0.627333 |
| H | -4.988031 | -0.127801 | -1.707946 |
| H | -5.187148 | -2.633834 | -1.425234 |
| N | -0.697037 | 2.045735  | -0.247771 |
| C | -0.410966 | 2.555360  | -1.511025 |
| C | -1.402051 | 2.831092  | 0.636491  |
| C | -0.713873 | 3.879057  | -1.863775 |
| C | -1.738507 | 4.161278  | 0.293282  |
| C | -1.370016 | 4.705411  | -0.941852 |
| H | -0.459660 | 4.262483  | -2.843718 |
| H | -2.285701 | 4.763881  | 1.010494  |
| H | -1.610467 | 5.733846  | -1.190545 |
| N | 1.954769  | 0.529485  | 0.544477  |
| C | 2.297495  | 0.148410  | 1.828740  |
| C | 2.931178  | 1.013086  | -0.275791 |
| C | 3.629325  | 0.216204  | 2.278182  |
| C | 4.269121  | 1.116146  | 0.124211  |
| H | 2.626386  | 1.315133  | -1.268863 |
| C | 4.629888  | 0.699428  | 1.420440  |
| H | 3.881013  | -0.084880 | 3.288446  |
| H | 5.006392  | 1.512817  | -0.565322 |
| H | 5.659910  | 0.761005  | 1.756667  |
| N | 0.349610  | 0.317068  | -2.023740 |
| C | 0.165743  | 1.602929  | -2.484703 |
| C | 0.811602  | -0.639013 | -2.879254 |
| C | 0.479351  | 1.937214  | -3.817760 |
| C | 1.129214  | -0.361946 | -4.213479 |
| H | 0.927506  | -1.634662 | -2.471145 |
| C | 0.967706  | 0.953211  | -4.690626 |
| H | 0.341138  | 2.948073  | -4.180863 |
| H | 1.493498  | -1.155522 | -4.856778 |
| H | 1.210724  | 1.204493  | -5.718056 |

|   |           |          |          |
|---|-----------|----------|----------|
| C | -2.325414 | 0.921488 | 2.314445 |
| C | -1.835503 | 2.384731 | 2.034850 |
| H | -1.015782 | 2.615004 | 2.731767 |
| H | -2.649874 | 3.058719 | 2.319518 |
| H | -2.739799 | 0.465301 | 1.416840 |
| H | -3.132227 | 0.970425 | 3.052568 |

---

### S1.b. TDDFT Singlet Excited States

Excited State 1: Singlet-A 2.4193 eV 512.47 nm f=0.0098  
135 ->138 -0.11687  
136 ->138 0.29885  
136 ->139 -0.15070  
137 ->138 0.44733  
137 ->139 -0.36172

This state for optimization and/or second-order correction.

Total Energy, E(RPA) = -1657.86807045

Copying the excited state density for this state as the 1-particle RhoCI density.

Excited State 2: Singlet-A 2.4833 eV 499.28 nm f=0.0046  
136 ->138 0.24347  
137 ->138 0.28964  
137 ->139 0.56168  
137 ->140 0.11921

Excited State 3: Singlet-A 2.5426 eV 487.62 nm f=0.0161  
135 ->138 -0.12194  
135 ->139 0.19803  
136 ->138 0.34125

|           |          |
|-----------|----------|
| 136 ->139 | -0.31571 |
| 136 ->140 | -0.34206 |
| 137 ->138 | -0.22502 |
| 137 ->140 | -0.17968 |

Excited State 4: Singlet-A 2.5591 eV 484.49 nm f=0.0185

|           |          |
|-----------|----------|
| 135 ->138 | 0.29884  |
| 135 ->140 | -0.20427 |
| 136 ->138 | 0.13478  |
| 136 ->139 | -0.27550 |
| 136 ->140 | 0.23566  |
| 137 ->138 | -0.20187 |
| 137 ->140 | 0.39319  |

Excited State 5: Singlet-A 2.5738 eV 481.71 nm f=0.0102

|           |          |
|-----------|----------|
| 135 ->138 | 0.27867  |
| 135 ->139 | -0.15366 |
| 136 ->138 | 0.40588  |
| 136 ->139 | 0.41543  |
| 136 ->140 | -0.10703 |
| 137 ->138 | -0.12024 |
| 137 ->139 | -0.13869 |

Excited State 6: Singlet-A 2.6425 eV 469.19 nm f=0.0398

|           |          |
|-----------|----------|
| 135 ->138 | 0.53553  |
| 135 ->139 | 0.11509  |
| 135 ->140 | 0.16373  |
| 136 ->138 | -0.11621 |
| 136 ->139 | -0.16787 |
| 136 ->140 | -0.14714 |
| 137 ->138 | 0.23377  |

137 ->140 -0.17563

Excited State 7: Singlet-A 2.7352 eV 453.29 nm f=0.0314

135 ->139 0.11229

135 ->140 0.49080

136 ->138 0.10643

136 ->140 0.39992

137 ->138 -0.15739

137 ->139 0.10002

137 ->140 -0.12057

Excited State 8: Singlet-A 2.8009 eV 442.66 nm f=0.1046

135 ->139 0.49281

135 ->140 -0.30545

136 ->139 0.21610

136 ->140 0.19309

137 ->140 -0.20170

Excited State 9: Singlet-A 2.9946 eV 414.03 nm f=0.0007

135 ->139 0.33259

135 ->140 0.24014

136 ->139 0.14511

136 ->140 -0.22296

136 ->144 -0.11937

137 ->140 0.36408

137 ->144 -0.10417

137 ->145 -0.12400

Excited State 10: Singlet-A 3.3515 eV 369.93 nm f=0.0111

136 ->141 0.13499

137 ->141 0.67920

Excited State 11: Singlet-A 3.4529 eV 359.07 nm f=0.0065  
136 ->141 0.67171  
137 ->141 -0.13623

Excited State 12: Singlet-A 3.5078 eV 353.45 nm f=0.0046  
135 ->142 -0.10908  
136 ->144 -0.10346  
137 ->142 0.46020  
137 ->143 0.19560  
137 ->144 0.21097  
137 ->145 -0.21218  
137 ->146 -0.16689  
137 ->151 0.17857

Excited State 13: Singlet-A 3.5513 eV 349.12 nm f=0.0034  
135 ->141 0.68625

Excited State 14: Singlet-A 3.5788 eV 346.44 nm f=0.0102  
135 ->142 -0.17450  
135 ->151 -0.10366  
136 ->142 0.31516  
136 ->145 -0.10963  
136 ->150 -0.14006  
136 ->151 0.13291  
137 ->142 0.29736  
137 ->143 -0.25123  
137 ->144 -0.30977  
137 ->150 -0.11768

Excited State 15: Singlet-A 3.6060 eV 343.83 nm f=0.0061

|           |          |
|-----------|----------|
| 135 ->142 | -0.12817 |
| 135 ->151 | -0.10470 |
| 136 ->142 | 0.37651  |
| 136 ->145 | -0.10868 |
| 136 ->151 | 0.16380  |
| 137 ->142 | -0.22152 |
| 137 ->143 | 0.38310  |
| 137 ->144 | 0.10345  |

Excited State 16: Singlet-A 3.6363 eV 340.96 nm f=0.0089

|           |          |
|-----------|----------|
| 135 ->142 | 0.17873  |
| 135 ->144 | 0.12502  |
| 135 ->151 | 0.11269  |
| 136 ->143 | 0.17652  |
| 136 ->145 | 0.14785  |
| 137 ->142 | 0.24228  |
| 137 ->143 | 0.36138  |
| 137 ->144 | -0.32098 |
| 137 ->145 | 0.15395  |
| 137 ->146 | 0.15192  |

Excited State 17: Singlet-A 3.6750 eV 337.37 nm f=0.0091

|           |          |
|-----------|----------|
| 134 ->138 | 0.10180  |
| 135 ->142 | 0.14273  |
| 135 ->143 | 0.16774  |
| 135 ->144 | 0.13104  |
| 136 ->142 | 0.27594  |
| 136 ->145 | 0.12717  |
| 137 ->142 | 0.16479  |
| 137 ->143 | -0.18511 |
| 137 ->144 | 0.39341  |



137 ->145 0.19076

137 ->146 0.14963

Excited State 18: Singlet-A 3.6875 eV 336.23 nm f=0.0286

132 ->138 0.10390

136 ->143 0.41030

136 ->144 0.28468

136 ->145 0.12012

136 ->146 -0.12595

136 ->150 0.11382

137 ->143 -0.19755

137 ->145 -0.29060

137 ->146 -0.12296

137 ->150 0.10831

Excited State 19: Singlet-A 3.7183 eV 333.45 nm f=0.0166

136 ->143 -0.38030

136 ->144 0.39254

136 ->145 -0.12445

137 ->145 -0.24440

137 ->146 0.25860

Excited State 20: Singlet-A 3.7236 eV 332.97 nm f=0.0061

135 ->142 0.36403

135 ->143 -0.12617

135 ->145 -0.21985

135 ->151 0.11376

136 ->142 0.26634

136 ->143 -0.16200

136 ->144 -0.15549

136 ->146 -0.10740

137 ->145 -0.15045

137 ->146 -0.29641

Excited State 21: Singlet-A 3.7459 eV 330.98 nm f=0.0304

135 ->143 -0.25468

135 ->145 -0.11223

135 ->150 -0.14759

136 ->143 0.22711

136 ->144 -0.15209

136 ->145 -0.13653

136 ->150 -0.12158

137 ->144 0.15055

137 ->145 -0.21852

137 ->146 0.33311

137 ->150 -0.22205

Excited State 22: Singlet-A 3.7724 eV 328.66 nm f=0.0015

135 ->142 -0.12527

135 ->143 -0.14234

135 ->144 -0.22216

135 ->146 0.15196

135 ->150 -0.12091

136 ->143 -0.11306

136 ->144 0.13318

136 ->145 0.51233

136 ->150 -0.12985

Excited State 23: Singlet-A 3.7878 eV 327.32 nm f=0.0033

136 ->144 0.30270

136 ->146 0.45877

136 ->150 -0.19023

137 ->146 -0.20293

137 ->150 -0.18071

Excited State 24: Singlet-A 3.8264 eV 324.03 nm f=0.0023

135 ->142 0.22295

135 ->143 0.33466

135 ->144 -0.30372

135 ->146 0.17794

136 ->142 -0.13575

136 ->146 -0.30993

136 ->150 -0.16175

Excited State 25: Singlet-A 3.8468 eV 322.30 nm f=0.0192

133 ->139 0.12891

135 ->142 0.12673

135 ->144 0.34081

135 ->145 0.39923

135 ->146 -0.12802

136 ->145 0.18048

136 ->146 -0.15601

136 ->150 -0.16263

137 ->150 -0.13869

Excited State 26: Singlet-A 3.8709 eV 320.30 nm f=0.0239

135 ->142 -0.23618

135 ->143 0.17888

135 ->144 0.35657

135 ->145 -0.34080

135 ->146 0.15141

136 ->146 -0.16637

136 ->150 -0.12252

137 ->146 -0.11357  
137 ->150 -0.13650

Excited State 27: Singlet-A 3.8792 eV 319.61 nm f=0.0015

133 ->139 -0.15759  
135 ->142 0.21321  
135 ->143 -0.28400  
135 ->144 0.16524  
135 ->146 0.48916  
137 ->145 0.12200  
137 ->150 0.13451

Excited State 28: Singlet-A 4.0099 eV 309.19 nm f=0.0344

134 ->138 0.44879  
134 ->140 0.10378  
135 ->143 -0.14977  
135 ->144 -0.12910  
135 ->150 0.23309  
136 ->142 -0.15498  
136 ->151 0.24151  
137 ->151 -0.14732

Excited State 29: Singlet-A 4.0662 eV 304.91 nm f=0.0146

133 ->138 -0.15206  
134 ->138 0.37093  
134 ->140 0.24080  
135 ->143 0.10232  
135 ->150 -0.20458  
136 ->151 -0.17368  
137 ->146 0.12442  
137 ->150 0.11288

|                   |           |           |           |          |
|-------------------|-----------|-----------|-----------|----------|
| 137 ->151         | 0.20598   |           |           |          |
| Excited State 30: | Singlet-A | 4.0814 eV | 303.78 nm | f=0.0064 |
| 133 ->138         | 0.45647   |           |           |          |
| 135 ->142         | 0.10248   |           |           |          |
| 135 ->145         | -0.17775  |           |           |          |
| 135 ->146         | -0.17721  |           |           |          |
| 135 ->151         | -0.22886  |           |           |          |
| 136 ->150         | -0.19080  |           |           |          |
| 137 ->150         | 0.15389   |           |           |          |
| 137 ->151         | 0.15633   |           |           |          |
| Excited State 31: | Singlet-A | 4.0856 eV | 303.46 nm | f=0.0082 |
| 133 ->138         | 0.50588   |           |           |          |
| 134 ->138         | 0.12700   |           |           |          |
| 134 ->140         | 0.11737   |           |           |          |
| 135 ->145         | 0.16319   |           |           |          |
| 135 ->146         | 0.17381   |           |           |          |
| 135 ->151         | 0.18646   |           |           |          |
| 136 ->150         | 0.16203   |           |           |          |
| 136 ->151         | -0.13749  |           |           |          |
| 137 ->150         | -0.10814  |           |           |          |
| Excited State 32: | Singlet-A | 4.1054 eV | 302.00 nm | f=0.0014 |
| 134 ->138         | 0.11043   |           |           |          |
| 134 ->139         | 0.68506   |           |           |          |
| Excited State 33: | Singlet-A | 4.2261 eV | 293.38 nm | f=0.0094 |
| 132 ->138         | -0.11257  |           |           |          |
| 132 ->139         | 0.12351   |           |           |          |
| 133 ->139         | 0.14643   |           |           |          |

|           |          |
|-----------|----------|
| 133 ->140 | 0.17852  |
| 134 ->140 | -0.12893 |
| 135 ->143 | -0.21568 |
| 135 ->146 | -0.15982 |
| 135 ->150 | -0.19463 |
| 136 ->144 | 0.15161  |
| 136 ->145 | -0.16725 |
| 136 ->146 | -0.16240 |
| 137 ->145 | 0.25506  |

Excited State 34: Singlet-A 4.2583 eV 291.16 nm f=0.0732

|           |          |
|-----------|----------|
| 132 ->138 | 0.41158  |
| 132 ->140 | -0.17529 |
| 134 ->138 | -0.12052 |
| 134 ->140 | 0.41151  |
| 136 ->146 | -0.10417 |

Excited State 35: Singlet-A 4.2873 eV 289.19 nm f=0.0473

|           |          |
|-----------|----------|
| 132 ->138 | -0.25739 |
| 132 ->139 | -0.26656 |
| 132 ->140 | 0.13795  |
| 133 ->139 | -0.30051 |
| 133 ->140 | 0.40564  |
| 134 ->140 | 0.17093  |

Excited State 36: Singlet-A 4.3050 eV 288.00 nm f=0.0311

|           |          |
|-----------|----------|
| 132 ->138 | -0.12468 |
| 132 ->139 | 0.60683  |
| 132 ->140 | 0.12106  |
| 133 ->140 | 0.10758  |
| 134 ->140 | 0.20752  |

Excited State 37: Singlet-A 4.3239 eV 286.74 nm f=0.0357

132 ->138 0.24247

132 ->140 -0.20111

133 ->139 0.14067

133 ->140 0.53250

134 ->140 -0.13601

Excited State 38: Singlet-A 4.4165 eV 280.73 nm f=0.3605

132 ->139 -0.17395

132 ->140 0.32259

133 ->139 0.40460

134 ->140 0.16168

135 ->145 -0.12228

Excited State 39: Singlet-A 4.4432 eV 279.04 nm f=0.0117

135 ->150 0.12037

135 ->151 -0.15526

136 ->150 0.25167

136 ->151 0.11937

137 ->147 -0.14744

137 ->150 -0.30899

137 ->151 0.37710

Excited State 40: Singlet-A 4.5285 eV 273.79 nm f=0.4936

132 ->138 0.25555

132 ->140 0.46185

132 ->141 -0.11322

133 ->139 -0.15422

134 ->140 -0.16411

Excited State 41: Singlet-A 4.5423 eV 272.95 nm f=0.0144

135 ->147 -0.15208

135 ->150 -0.33686

136 ->146 0.10643

136 ->148 0.14482

136 ->149 0.12465

136 ->150 0.12524

136 ->151 0.38152

136 ->152 -0.10698

137 ->151 -0.12116

Excited State 42: Singlet-A 4.6633 eV 265.87 nm f=0.0282

135 ->148 0.10361

135 ->151 0.43313

135 ->152 -0.10630

136 ->150 -0.14807

136 ->151 0.21452

137 ->148 0.12940

137 ->151 0.28385

Excited State 43: Singlet-A 4.8462 eV 255.84 nm f=0.0067

134 ->141 0.65238

134 ->144 0.10519

Excited State 44: Singlet-A 4.9033 eV 252.86 nm f=0.0150

133 ->141 0.59473

137 ->147 -0.21936

Excited State 45: Singlet-A 4.9420 eV 250.88 nm f=0.0085

131 ->138 0.15684

132 ->141 -0.18915



|           |          |
|-----------|----------|
| 133 ->141 | 0.22150  |
| 134 ->142 | -0.14850 |
| 137 ->147 | 0.49389  |
| 137 ->150 | -0.15638 |

Excited State 46: Singlet-A 4.9874 eV 248.59 nm f=0.0264

|           |          |
|-----------|----------|
| 131 ->138 | -0.22644 |
| 134 ->142 | 0.42040  |
| 134 ->145 | -0.12218 |
| 134 ->146 | -0.15243 |
| 136 ->147 | 0.19941  |
| 136 ->149 | 0.11020  |
| 136 ->150 | -0.10202 |
| 137 ->147 | 0.21212  |
| 137 ->148 | -0.12159 |

Excited State 47: Singlet-A 5.0028 eV 247.83 nm f=0.0023

|           |          |
|-----------|----------|
| 132 ->141 | -0.31913 |
| 133 ->145 | 0.11069  |
| 134 ->142 | 0.14271  |
| 136 ->147 | -0.20883 |
| 137 ->148 | 0.41462  |
| 137 ->149 | -0.19707 |

Excited State 48: Singlet-A 5.0315 eV 246.41 nm f=0.0126

|           |          |
|-----------|----------|
| 132 ->141 | 0.22835  |
| 134 ->141 | -0.10342 |
| 134 ->143 | -0.28649 |
| 136 ->147 | 0.31863  |
| 137 ->148 | 0.33379  |
| 137 ->149 | 0.17405  |

137 ->150 -0.14380

137 ->151 -0.10589

Excited State 49: Singlet-A 5.0445 eV 245.78 nm f=0.0077

130 ->138 -0.11208

134 ->143 0.17618

134 ->144 -0.16842

136 ->147 0.41988

136 ->148 -0.11989

136 ->149 -0.11566

137 ->149 -0.33715

Excited State 50: Singlet-A 5.0711 eV 244.49 nm f=0.0159

129 ->138 -0.13560

131 ->138 -0.26816

132 ->141 0.34837

133 ->142 -0.11241

134 ->142 -0.10941

134 ->143 0.15626

136 ->147 -0.17977

136 ->148 0.16616

136 ->149 -0.10751

137 ->147 0.19300

137 ->148 0.12887

137 ->149 -0.19281

### S1.c. TDDFT

Shown in Figure S1c are the simulated and experimental absorption spectra for the  $[\text{Ru}(\text{bpy})(\text{O-bpy})]^{2+}$  complex. The simulated spectrum for  $[(\text{Ru}(\text{bpy})_2)_2(\text{O-bpy})]^{4+}$  was not calculated due to computational expense. The simulated spectrum was calculated in the gas phase and closely agrees with the experimental spectra. The low energy band maximum is the same for both the experimental and calculated spectra, 454 nm. The  $\pi$  to  $\pi^*$  transition for the experimental spectrum is found at 290 nm, where it is blue shifted for the calculated spectrum by 12 nm. The shoulder located at 360 nm in the calculated spectrum is not resolved in the experimental one.

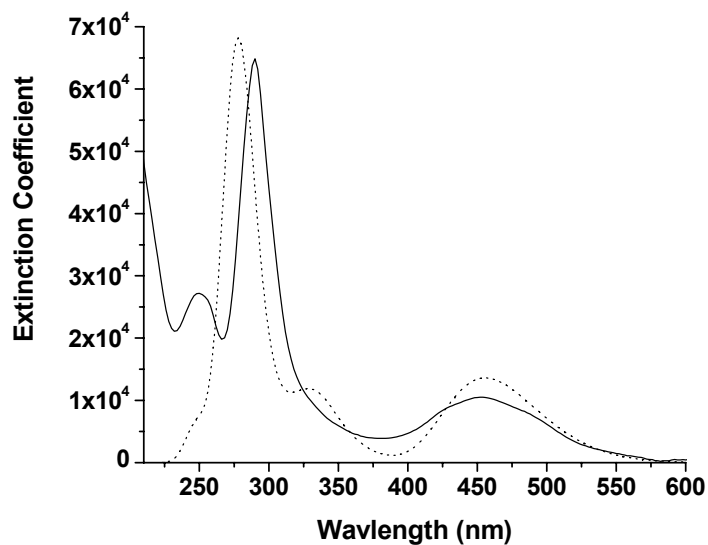

Figure S1c. Simulated (---, gas phase) and experimental (—, acetonitrile)  $[\text{Ru}(\text{bpy})(\text{O-bpy})]^{2+}$

### S1.d. TDDFT Triplet Results

Excited State 1: ?Spin -A 0.1327 eV 9343.73 nm f=0.0005  
138A ->139A 0.26048  
124B ->137B -0.12604  
126B ->137B 0.10917  
131B ->137B -0.11442  
132B ->137B -0.14136  
133B ->137B 0.17262  
134B ->137B 0.20078  
135B ->137B -0.44609  
136B ->137B 1.05012  
136B ->140B -0.12428

This state for optimization and/or second-order correction.

Total Energy, E(RPA) = -1657.87361623

Copying the excited state density for this state as the 1-particle RhoCI density.

Excited State 2: ?Spin -A 0.1675 eV 7400.79 nm f=0.0051  
138A ->139A 0.54919  
136B ->137B -0.42165

Excited State 3: ?Spin -A 0.2294 eV 5405.33 nm f=0.0073  
138A ->140A 0.57428  
132B ->137B 0.10888  
135B ->137B 0.50650  
136B ->137B 0.13122

Excited State 4: ?Spin -A 0.2678 eV 4629.10 nm f=0.0036  
138A ->140A -0.28583  
123B ->137B 0.12000

132B ->137B 0.19626  
134B ->137B 0.20372  
135B ->137B 0.80255  
135B ->140B -0.10006  
136B ->137B 0.30066

Excited State 5: ?Spin -A 0.9335 eV 1328.11 nm f=0.0027  
138A ->141A 1.00104

### S2.a. Cartesian Coordinates from Calculation

| Atom | Coordinates |           |           |
|------|-------------|-----------|-----------|
|      | X           | Y         | Z         |
| Ru   | 0.000000    | 0.000000  | 0.000000  |
| N    | 0.000000    | 0.000000  | 2.089145  |
| C    | 1.245325    | 0.000000  | 2.687705  |
| C    | -1.109592   | 0.030470  | 2.882421  |
| C    | 1.377519    | 0.038061  | 4.088698  |
| C    | -1.035683   | 0.072387  | 4.280656  |
| H    | -2.065956   | 0.035053  | 2.375814  |
| C    | 0.230255    | 0.079228  | 4.897695  |
| H    | 2.358947    | 0.042539  | 4.548968  |
| H    | -1.948054   | 0.108438  | 4.866300  |
| H    | 0.320240    | 0.121995  | 5.978463  |
| N    | 2.048980    | -0.212937 | 0.422894  |
| C    | 2.385375    | -0.027925 | 1.750203  |
| C    | 3.044944    | -0.224919 | -0.509994 |
| C    | 3.725665    | 0.166220  | 2.139605  |
| C    | 4.393001    | -0.035778 | -0.179258 |
| H    | 2.736704    | -0.366235 | -1.538580 |
| C    | 4.741027    | 0.173588  | 1.170388  |

|   |           |           |           |
|---|-----------|-----------|-----------|
| H | 3.972665  | 0.346580  | 3.179443  |
| H | 5.142178  | -0.025246 | -0.963917 |
| H | 5.771344  | 0.362199  | 1.455877  |
| N | -0.837537 | -2.029462 | -0.050679 |
| C | -0.230562 | -3.269568 | 0.078052  |
| C | -2.203376 | -2.000103 | -0.308162 |
| C | -0.972020 | -4.454751 | -0.086528 |
| C | -2.962931 | -3.172798 | -0.475626 |
| C | -2.342228 | -4.416811 | -0.371946 |
| H | -0.481690 | -5.411019 | 0.010279  |
| H | -4.022383 | -3.117854 | -0.685286 |
| H | -2.911833 | -5.330755 | -0.504808 |
| N | 0.200311  | 0.164260  | -2.084433 |
| C | -0.007506 | -0.835065 | -2.988434 |
| C | 0.522054  | 1.423536  | -2.550581 |
| C | 0.094130  | -0.636348 | -4.371185 |
| H | -0.265801 | -1.804190 | -2.581219 |
| C | 0.637845  | 1.679823  | -3.929767 |
| C | 0.421876  | 0.645205  | -4.853445 |
| H | -0.087877 | -1.462150 | -5.050463 |
| H | 0.884185  | 2.672581  | -4.287038 |
| H | 0.501914  | 0.835496  | -5.918912 |
| N | -2.028086 | 0.408537  | -0.228206 |
| C | -2.855436 | -0.675943 | -0.391827 |
| C | -2.570059 | 1.661181  | -0.255012 |
| C | -4.240363 | -0.503050 | -0.595208 |
| C | -3.937250 | 1.889936  | -0.447691 |
| H | -1.890881 | 2.489147  | -0.114659 |
| C | -4.791379 | 0.786567  | -0.627359 |
| H | -4.895899 | -1.354244 | -0.725093 |
| H | -4.316503 | 2.906064  | -0.458150 |
| H | -5.856162 | 0.925812  | -0.784026 |

Electronic Supplementary Information for Dalton Transactions  
This journal is © The Royal Society of Chemistry 2008

|    |          |            |           |
|----|----------|------------|-----------|
| N  | 0.515522 | 2.017185   | -0.211628 |
| C  | 0.662547 | 2.909254   | 0.810294  |
| C  | 0.719249 | 2.448732   | -1.506761 |
| C  | 1.011290 | 4.249052   | 0.597528  |
| H  | 0.480264 | 2.537031   | 1.809885  |
| C  | 1.074170 | 3.783925   | -1.777179 |
| C  | 1.223734 | 4.696447   | -0.720588 |
| H  | 1.108966 | 4.921077   | 1.443349  |
| H  | 1.230396 | 4.115963   | -2.796562 |
| H  | 1.493640 | 5.728565   | -0.920199 |
| C  | 1.260798 | -3.349614  | 0.399357  |
| H  | 1.804884 | -2.843331  | -0.407920 |
| H  | 1.444348 | -2.761785  | 1.306611  |
| C  | 1.820813 | -4.792067  | 0.590461  |
| H  | 1.236841 | -5.320547  | 1.354052  |
| H  | 1.694250 | -5.361730  | -0.338771 |
| C  | 3.292181 | -4.865109  | 0.996930  |
| C  | 4.073598 | -3.693530  | 1.003505  |
| N  | 3.840017 | -6.084265  | 1.362965  |
| C  | 5.418991 | -3.725269  | 1.389507  |
| H  | 3.635895 | -2.755786  | 0.696748  |
| Ru | 3.030105 | -8.128655  | 1.252404  |
| C  | 5.161504 | -6.098750  | 1.791848  |
| C  | 5.961919 | -4.941686  | 1.801818  |
| H  | 6.026111 | -2.826216  | 1.374599  |
| N  | 3.654528 | -8.213526  | -0.747641 |
| N  | 1.199668 | -7.963225  | 0.227287  |
| N  | 4.904245 | -8.484500  | 2.084086  |
| N  | 2.230738 | -8.197992  | 3.185085  |
| N  | 2.474082 | -10.136749 | 1.396448  |
| C  | 5.719048 | -7.390248  | 2.247391  |
| H  | 6.996307 | -4.990545  | 2.113926  |

|   |           |            |           |
|---|-----------|------------|-----------|
| C | 2.646006  | -8.191834  | -1.691163 |
| C | 4.948061  | -8.289991  | -1.174369 |
| C | 1.277491  | -8.146484  | -1.139704 |
| C | -0.029232 | -7.977573  | 0.820244  |
| C | 5.359746  | -9.709512  | 2.479185  |
| C | 1.754596  | -9.430335  | 3.587632  |
| C | 2.198018  | -7.160745  | 4.069212  |
| C | 1.865497  | -10.504352 | 2.580348  |
| C | 2.650028  | -11.077724 | 0.425036  |
| C | 7.000400  | -7.522695  | 2.821356  |
| C | 2.936451  | -8.239821  | -3.067599 |
| C | 5.293791  | -8.346403  | -2.530845 |
| H | 5.710711  | -8.320795  | -0.407288 |
| C | 0.116234  | -8.338851  | -1.914505 |
| C | -1.213997 | -8.180615  | 0.101200  |
| H | -0.044913 | -7.842612  | 1.894665  |
| C | 6.625460  | -9.899371  | 3.045491  |
| H | 4.695768  | -10.548050 | 2.329604  |
| C | 1.229925  | -9.618688  | 4.880310  |
| C | 1.689726  | -7.292615  | 5.367500  |
| H | 2.601373  | -6.219824  | 3.716116  |
| C | 1.421877  | -11.824194 | 2.785582  |
| C | 2.233112  | -12.406342 | 0.579530  |
| H | 3.146236  | -10.752347 | -0.479914 |
| C | 7.463699  | -8.783819  | 3.224799  |
| H | 7.637816  | -6.660136  | 2.966713  |
| C | 4.270799  | -8.319275  | -3.497889 |
| H | 2.137397  | -8.220748  | -3.799690 |
| H | 6.337672  | -8.417544  | -2.817075 |
| C | -1.142362 | -8.365709  | -1.293959 |
| H | 0.192126  | -8.506116  | -2.982558 |
| H | -2.161711 | -8.219834  | 0.628232  |



|   |           |            |           |
|---|-----------|------------|-----------|
| H | 6.939385  | -10.895212 | 3.339174  |
| C | 1.193518  | -8.543831  | 5.782354  |
| H | 1.693440  | -6.440360  | 6.038469  |
| C | 1.602910  | -12.787527 | 1.779603  |
| H | 0.944462  | -12.106071 | 3.716585  |
| H | 2.401857  | -13.119999 | -0.219679 |
| H | 8.448608  | -8.892342  | 3.667357  |
| H | 4.506142  | -8.366227  | -4.556331 |
| H | -2.038100 | -8.550320  | -1.878742 |
| H | 0.798488  | -8.681663  | 6.783780  |
| H | 1.267061  | -13.808525 | 1.930302  |
| H | 0.864562  | -10.590496 | 5.190403  |

### S2.b. TDDFT Triplet Results

Excited state symmetry could not be determined.

Excited State 1: ?Spin -?Sym 0.1014 eV 12225.55 nm f=0.0033

268A ->269A -0.72652

268A ->270A -0.12753

This state for optimization and/or second-order correction.

Total Energy, E(RPA) = -3238.24009815

Copying the excited state density for this state as the 1-particle RhoCI density.

Excited state symmetry could not be determined.

Excited State 2: ?Spin -?Sym 0.1225 eV 10124.90 nm f=0.0034

268A ->269A 0.20897

268A ->270A -0.47798

Excited state symmetry could not be determined.

Excited State 3: ?Spin -?Sym 0.2835 eV 4373.23 nm f=0.0000

238B ->267B 0.19968  
256B ->267B 0.10802  
259B ->267B -0.18012  
260B ->267B 0.39735  
262B ->267B 0.74383  
263B ->267B 0.63812

Excited state symmetry could not be determined.

Excited State 4: ?Spin -?Sym 0.3336 eV 3716.06 nm f=0.0003

234B ->267B 0.12559  
237B ->267B -0.14027  
258B ->267B -0.59718  
259B ->267B -0.54307  
261B ->267B -0.32758  
262B ->267B 0.37613  
263B ->267B -0.46467

Excited state symmetry could not be determined.

Excited State 5: ?Spin -?Sym 0.5149 eV 2407.76 nm f=0.0018

268A ->271A 0.99143

### S3.a. Cartesian Coordinates from calculations

| Atom | Coordinates |           |           |
|------|-------------|-----------|-----------|
|      | X           | Y         | Z         |
| Ru   | -0.005579   | 0.060399  | -0.059220 |
| N    | -0.048855   | -0.003083 | 2.030848  |
| C    | 1.173270    | -0.179353 | 2.648027  |
| C    | -1.169278   | 0.087796  | 2.802966  |
| C    | 1.271028    | -0.263199 | 4.049799  |
| C    | -1.129138   | 0.013140  | 4.200695  |

Electronic Supplementary Information for Dalton Transactions  
This journal is © The Royal Society of Chemistry 2008

|   |           |           |           |
|---|-----------|-----------|-----------|
| H | -2.105609 | 0.226208  | 2.277884  |
| C | 0.113704  | -0.166731 | 4.837871  |
| H | 2.234047  | -0.405038 | 4.525810  |
| H | -2.048869 | 0.092242  | 4.770143  |
| H | 0.179040  | -0.230734 | 5.919254  |
| N | 2.020744  | -0.193225 | 0.390672  |
| C | 2.329307  | -0.266898 | 1.734324  |
| C | 3.032141  | -0.265445 | -0.521520 |
| C | 3.661333  | -0.416420 | 2.164598  |
| C | 4.373457  | -0.415844 | -0.148898 |
| H | 2.746518  | -0.203822 | -1.563841 |
| C | 4.696279  | -0.492013 | 1.219664  |
| H | 3.894169  | -0.470779 | 3.221424  |
| H | 5.141066  | -0.469289 | -0.913323 |
| H | 5.726361  | -0.606245 | 1.541566  |
| N | -0.494445 | -1.972821 | -0.091888 |
| C | 0.387287  | -3.002304 | 0.058973  |
| C | -1.834300 | -2.262128 | -0.256757 |
| C | -0.012508 | -4.344213 | 0.048975  |
| H | 1.427530  | -2.731232 | 0.186006  |
| C | -2.291209 | -3.593586 | -0.273521 |
| C | -1.377307 | -4.647571 | -0.119613 |
| H | 0.728188  | -5.126904 | 0.172298  |
| H | -3.344941 | -3.810925 | -0.401730 |
| H | -1.719996 | -5.677246 | -0.129842 |
| N | 0.240019  | 0.275721  | -2.124357 |
| C | 0.161028  | -0.731063 | -3.041056 |
| C | 0.478850  | 1.561653  | -2.566415 |
| C | 0.317326  | -0.512876 | -4.415281 |
| H | -0.026848 | -1.723531 | -2.651988 |
| C | 0.643173  | 1.837549  | -3.937121 |
| C | 0.562648  | 0.795698  | -4.874043 |

|   |           |           |           |
|---|-----------|-----------|-----------|
| H | 0.246142  | -1.347962 | -5.103740 |
| H | 0.828861  | 2.850112  | -4.275192 |
| H | 0.686550  | 0.998768  | -5.932887 |
| N | -2.076920 | 0.135301  | -0.336368 |
| C | -2.714184 | -1.087021 | -0.410573 |
| C | -2.817391 | 1.272861  | -0.467753 |
| C | -4.104487 | -1.167089 | -0.616151 |
| C | -4.202585 | 1.251069  | -0.671485 |
| H | -2.276682 | 2.208095  | -0.402373 |
| C | -4.860129 | 0.008233  | -0.748421 |
| H | -4.596515 | -2.130643 | -0.676145 |
| H | -4.746645 | 2.184321  | -0.768675 |
| H | -5.932333 | -0.043619 | -0.907912 |
| N | 0.328758  | 2.118753  | -0.224999 |
| C | 0.373194  | 3.001626  | 0.813671  |
| C | 0.545448  | 2.586282  | -1.505931 |
| C | 0.625703  | 4.366910  | 0.632006  |
| H | 0.198008  | 2.594217  | 1.801076  |
| C | 0.805425  | 3.948937  | -1.745360 |
| C | 0.846911  | 4.851530  | -0.671468 |
| H | 0.649366  | 5.028272  | 1.491348  |
| H | 0.976953  | 4.306491  | -2.753725 |
| H | 1.047401  | 5.903695  | -0.846130 |

### S3.b. TDDFT Triplet Results

Excited state symmetry could not be determined.

Excited State 1: ?Spin -?Sym 0.0889 eV 13946.41 nm f=0.0018  
131A ->132A 0.42552

This state for optimization and/or second-order correction.

Total Energy, E(RPA) = -1580.48243672

Copying the excited state density for this state as the 1-particle RhoCI density.

Excited state symmetry could not be determined.

Excited State 2: ?Spin -?Sym 0.0935 eV 13260.08 nm f=0.0020

131A ->133A 0.43745

Excited state symmetry could not be determined.

Excited State 3: ?Spin -?Sym 0.2604 eV 4760.62 nm f=0.0001

116B ->130B -0.18723

117B ->130B 0.12604

126B ->130B 0.11543

127B ->130B 0.35893

128B ->130B 0.76862

129B ->130B -0.67532

Excited state symmetry could not be determined.

Excited State 4: ?Spin -?Sym 0.2606 eV 4757.14 nm f=0.0001

116B ->130B 0.12589

117B ->130B 0.18739

126B ->130B 0.35677

127B ->130B -0.11642

128B ->130B 0.67614

129B ->130B 0.76831

Excited state symmetry could not be determined.

Excited State 5: ?Spin -?Sym 0.8508 eV 1457.26 nm f=0.0000

131A ->134A 1.01491

#### S4. Graphical Representation of Orbital Distribution

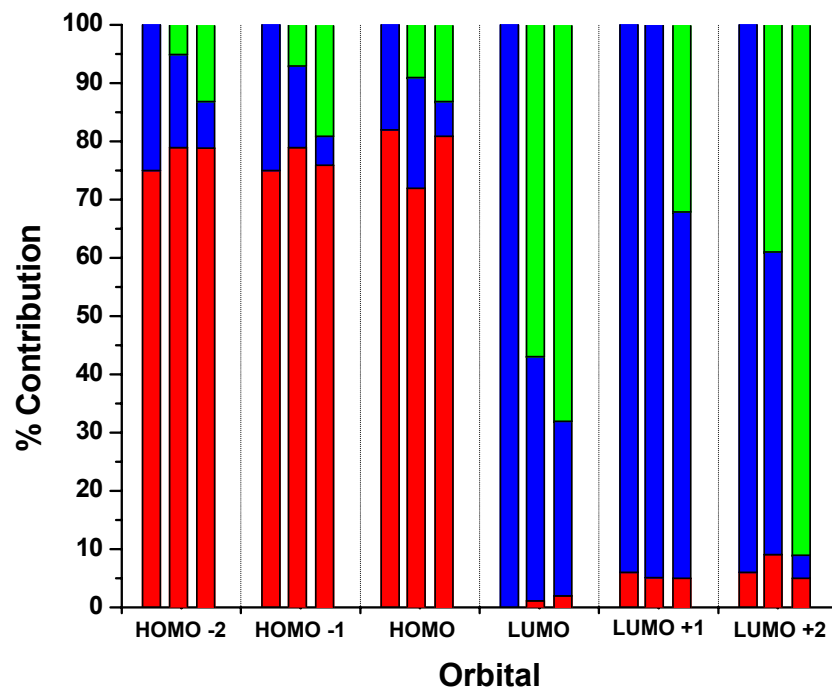

Figure S4. Graphical representation of the orbital contributions: Red – Ruthenium orbitals, Blue – bpy, Green – O-bpy. The order of the columns in each set of three is [Ru(bpy)<sub>3</sub>]<sup>2+</sup>, [Ru(bpy)(O-bpy)]<sup>2+</sup>, [(Ru(bpy)<sub>2</sub>)<sub>2</sub>(O-bpy)]<sup>4+</sup>

**S5. Inter atom bond distances of O-bpy dimer**

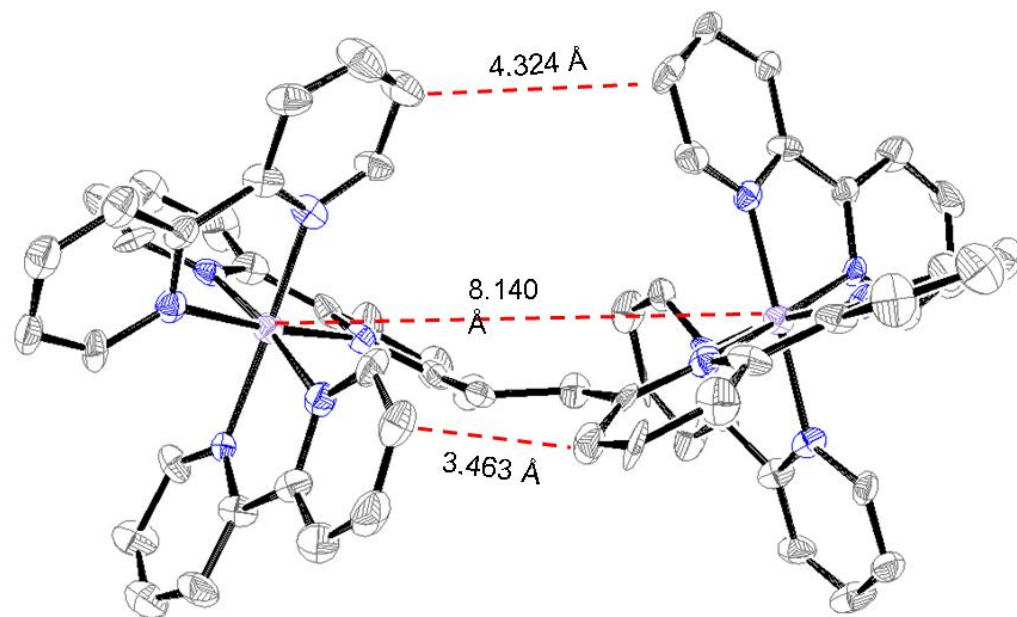

### S6. TDDFT Triplet State Results

| Compound    | State | f     | Transition      | Type                                        | Energy                   |
|-------------|-------|-------|-----------------|---------------------------------------------|--------------------------|
|             |       |       |                 | <b>Singlet Triplet Energy Gap</b>           | <b>17.2</b>              |
|             |       |       |                 |                                             | <b><sup>3</sup>MLLCT</b> |
|             | 1     | 0.001 | H-2 → H-1 (0.7) | Ru(0.6) → Ru(0.7)                           | 18.2                     |
|             |       |       |                 |                                             | <b><sup>3</sup>d-d</b>   |
| O-Bpy       | 2     | 0.005 | H → L (0.6)     | Bpy(0.4), O-Bpy(0.6) → O-Bpy(0.9)           | 18.5                     |
|             |       |       | H-2 → H-1 (0.4) | Ru(0.6) → Ru(0.7)                           |                          |
|             |       |       |                 |                                             | <b><sup>3</sup>ILCT</b>  |
|             |       |       |                 |                                             | <b><sup>3</sup>d-d</b>   |
|             | 3     | 0.007 | H → L+1 (0.5)   | Bpy(0.4), O-Bpy(0.6) → Bpy(0.6), O-Bpy(0.4) | 19.0                     |
|             |       |       | H-3 → H-1 (0.4) | Ru(0.6) → Ru(0.7)                           |                          |
|             |       |       |                 |                                             | <b><sup>3</sup>ILCT</b>  |
|             |       |       |                 |                                             | <b><sup>3</sup>d-d</b>   |
|             | 4     | 0.004 | H-3 → H-1 (0.7) | Ru(0.6) → Ru(0.7)                           | 19.3                     |
|             |       |       |                 |                                             | <b><sup>3</sup>d-d</b>   |
|             |       |       |                 | <b>Singlet Triplet Energy Gap</b>           | <b>17.6</b>              |
|             |       |       |                 |                                             | <b><sup>3</sup>MLLCT</b> |
|             | 1     | 0.003 | H → L (1.0)     | Bpy(0.6), O-Bpy(0.4) → Bpy(0.9), O-Bpy(0.1) | 18.4                     |
|             |       |       | H → L+1         | Bpy(0.6), O-Bpy(0.4) → Bpy(0.5), O-Bpy(0.5) |                          |
|             |       |       |                 |                                             | <b><sup>3</sup>ILCT</b>  |
| O-Bpy Dimer | 2     | 0.003 | (0.8)           | Bpy(0.4) → Bpy(0.5)                         | 18.6                     |
|             |       |       |                 |                                             | <b><sup>3</sup>ILCT</b>  |
|             | 3     | 0.000 | H-6 → H-1 (0.5) | Ru(0.4), L(0.6) → Ru(0.8)                   | 19.9                     |
|             |       |       | H-5 → H-1 (0.3) | Ru(0.3), L(0.7) → Ru(0.8)                   |                          |
|             |       |       |                 |                                             | <b><sup>3</sup>MLMCT</b> |
|             |       |       |                 |                                             | <b><sup>3</sup>MLMCT</b> |
|             | 4     | 0.000 | H-9 → H-1 (0.4) | Ru(0.3), L(0.7) → Ru(0.8)                   | 20.3                     |
|             |       |       | H-8 → H-1 (0.3) | Ru(0.2), L(0.8) → Ru(0.8)                   |                          |
|             |       |       |                 |                                             | <b><sup>3</sup>MLMCT</b> |
|             |       |       |                 |                                             | <b><sup>3</sup>MLMCT</b> |
|             |       |       |                 | <b>Singlet Triplet Energy Gap</b>           | <b>17.7</b>              |
|             |       |       |                 |                                             | <b><sup>3</sup>MLLCT</b> |
|             | 1     | 0.002 | H → L (1.0)     | Bpy(1.0) → Bpy(1.0)                         | 18.4                     |
|             |       |       | H → L+1         |                                             |                          |
|             |       |       |                 |                                             | <b><sup>3</sup>ILCT</b>  |
| Bpy         | 2     | 0.002 | (1.0)           | Bpy(1.0) → Bpy(1.0)                         | 18.4                     |
|             |       |       |                 |                                             | <b><sup>3</sup>ILCT</b>  |
|             | 3     | 0.000 | H-3 → H-1 (0.5) | Ru(0.6), Bpy(0.4) → Ru(0.8)                 | 19.8                     |
|             |       |       | H-2 → H-1 (0.4) | Ru(0.6), Bpy(0.4) → Ru(0.8)                 |                          |
|             |       |       |                 |                                             | <b><sup>3</sup>MLMCT</b> |
|             |       |       |                 |                                             | <b><sup>3</sup>MLMCT</b> |
|             | 4     | 0.000 | H-3 → H-1 (0.4) | Ru(0.6), Bpy(0.4) → Ru(0.8)                 | 19.8                     |
|             |       |       | H-2 → H-1 (0.5) | Ru(0.6), Bpy(0.4) → Ru(0.8)                 |                          |
|             |       |       |                 |                                             | <b><sup>3</sup>MLMCT</b> |
|             |       |       |                 |                                             | <b><sup>3</sup>MLMCT</b> |
